# Supplementary material for: Host phenotype classification from human microbiome data is mainly driven by the presence of microbial taxa
Source: PubMed Central journal article supplement (PMC9064115; doi:10.1371/journal.pcbi.1010066), 2022-04-21
Supplement: pcbi.1010066.s025.pdf [file pcbi.1010066.s025.pdf]

## Editors

We consider that the scientific questions have been addressed in this revision. However, before accepting the manuscript, we ask that the authors revise the figures, particularly the supplemental ones, for improved readability and accessibility.

### Response

We thank you again for overall positive feedback about our work. We revised all figures, including supplemental ones, for improved readability and accessibility.

The fonts and markers are often too small to read comfortably even though there appears to be space available. This is particularly true in the supplemental figures, but some of the main figures could also be improved.

### Response

We enlarged fonts and markers in all figures, including supplemental ones, to guarantee a more comfortable reading.

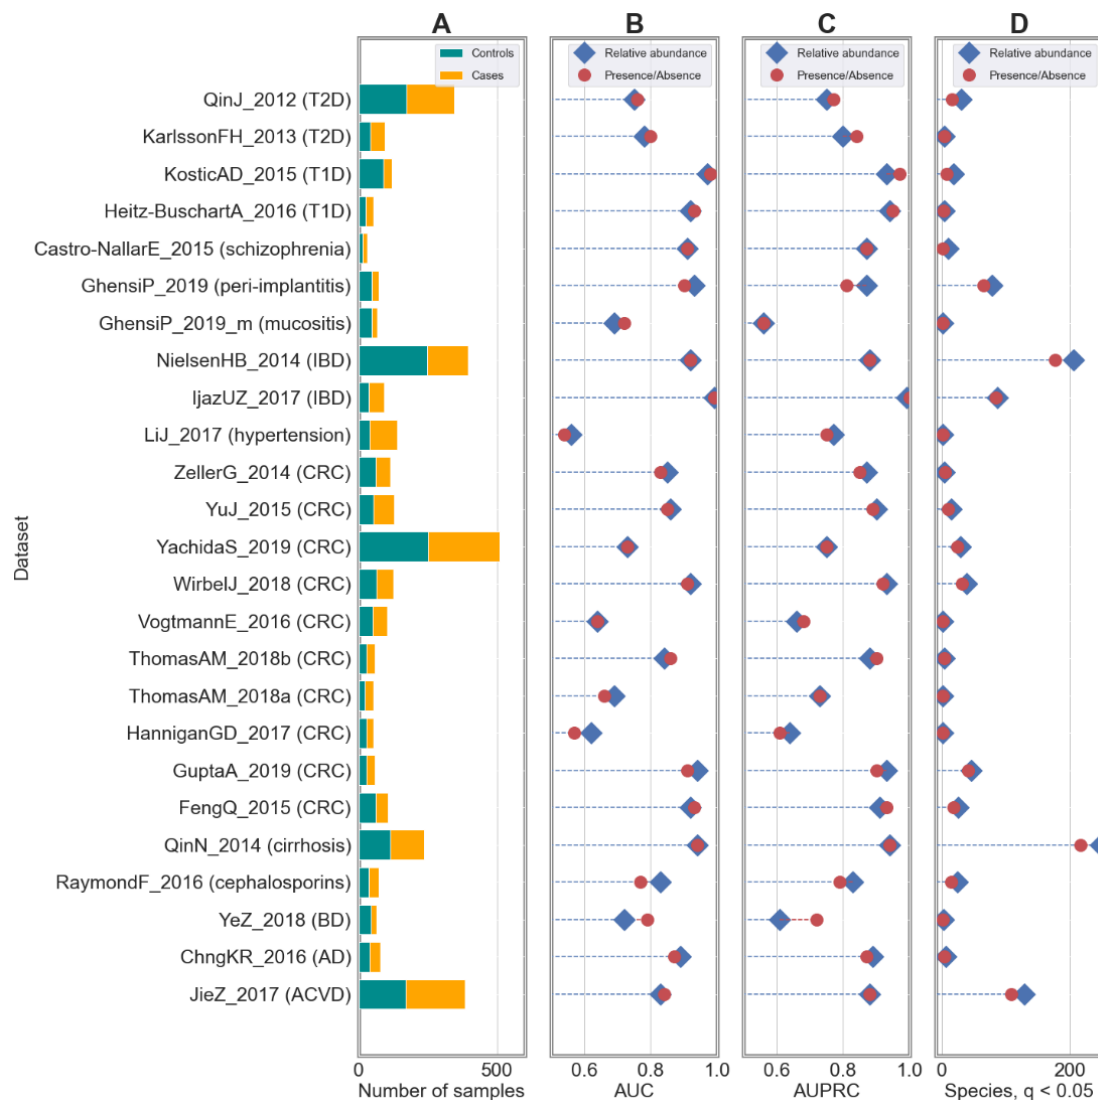

Fig. 1.

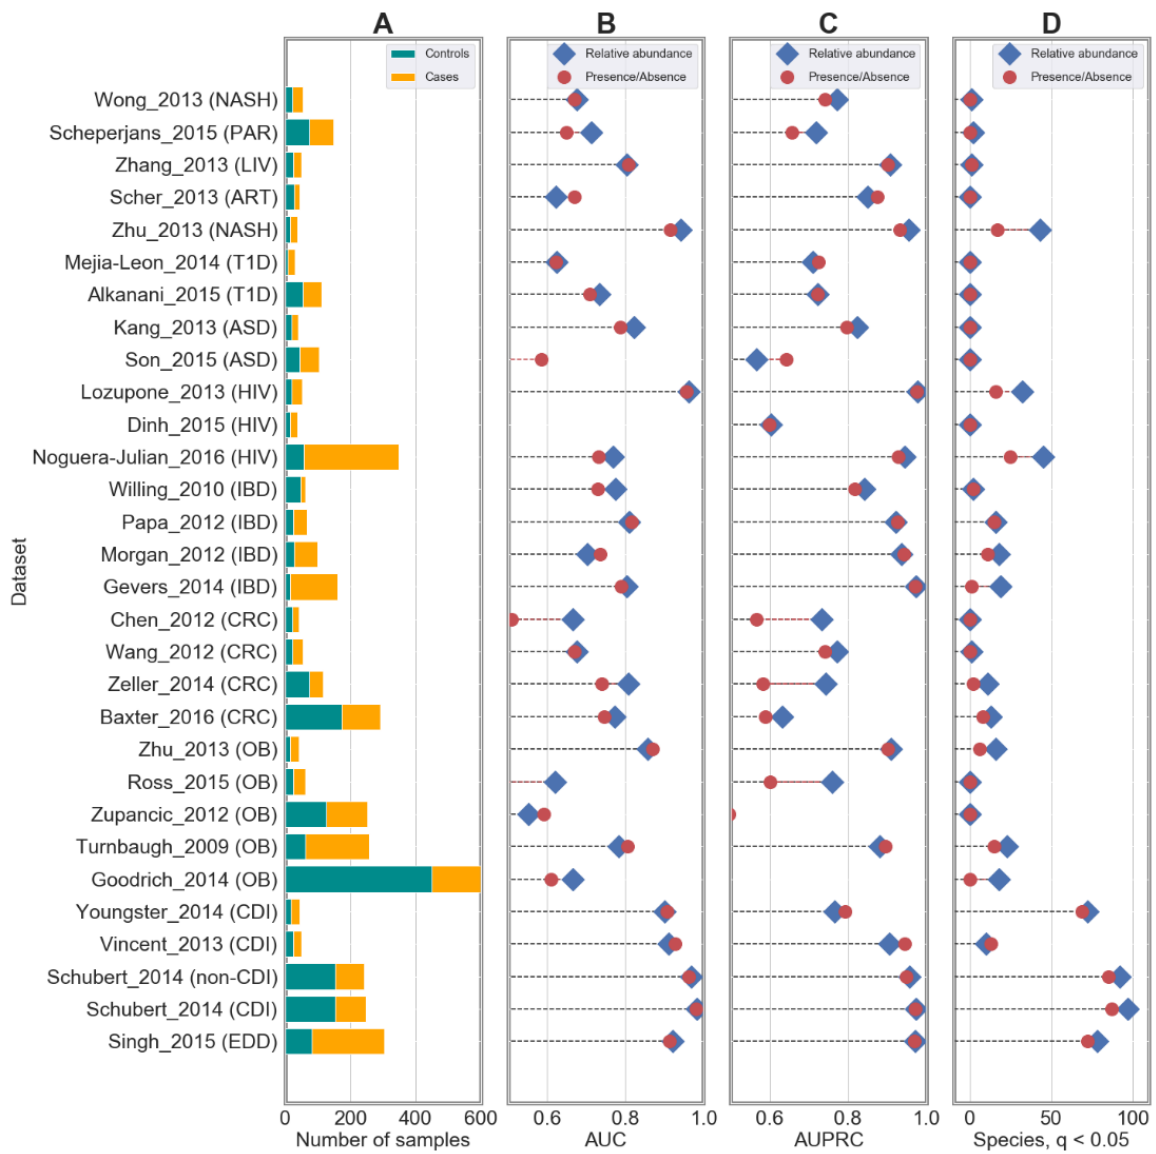

Fig. 2.

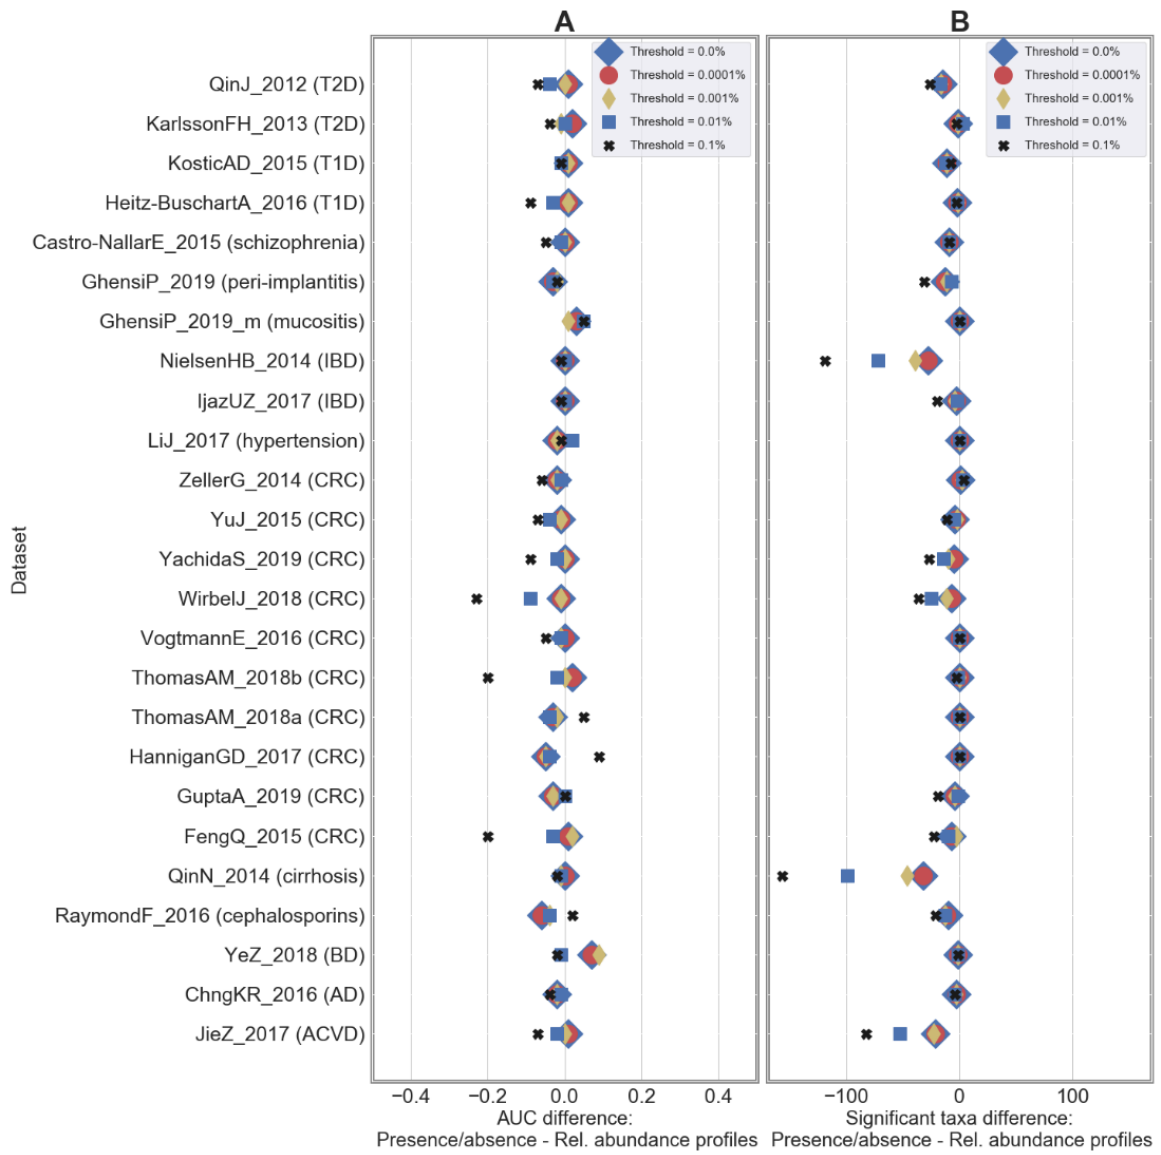

**Fig. 3.**

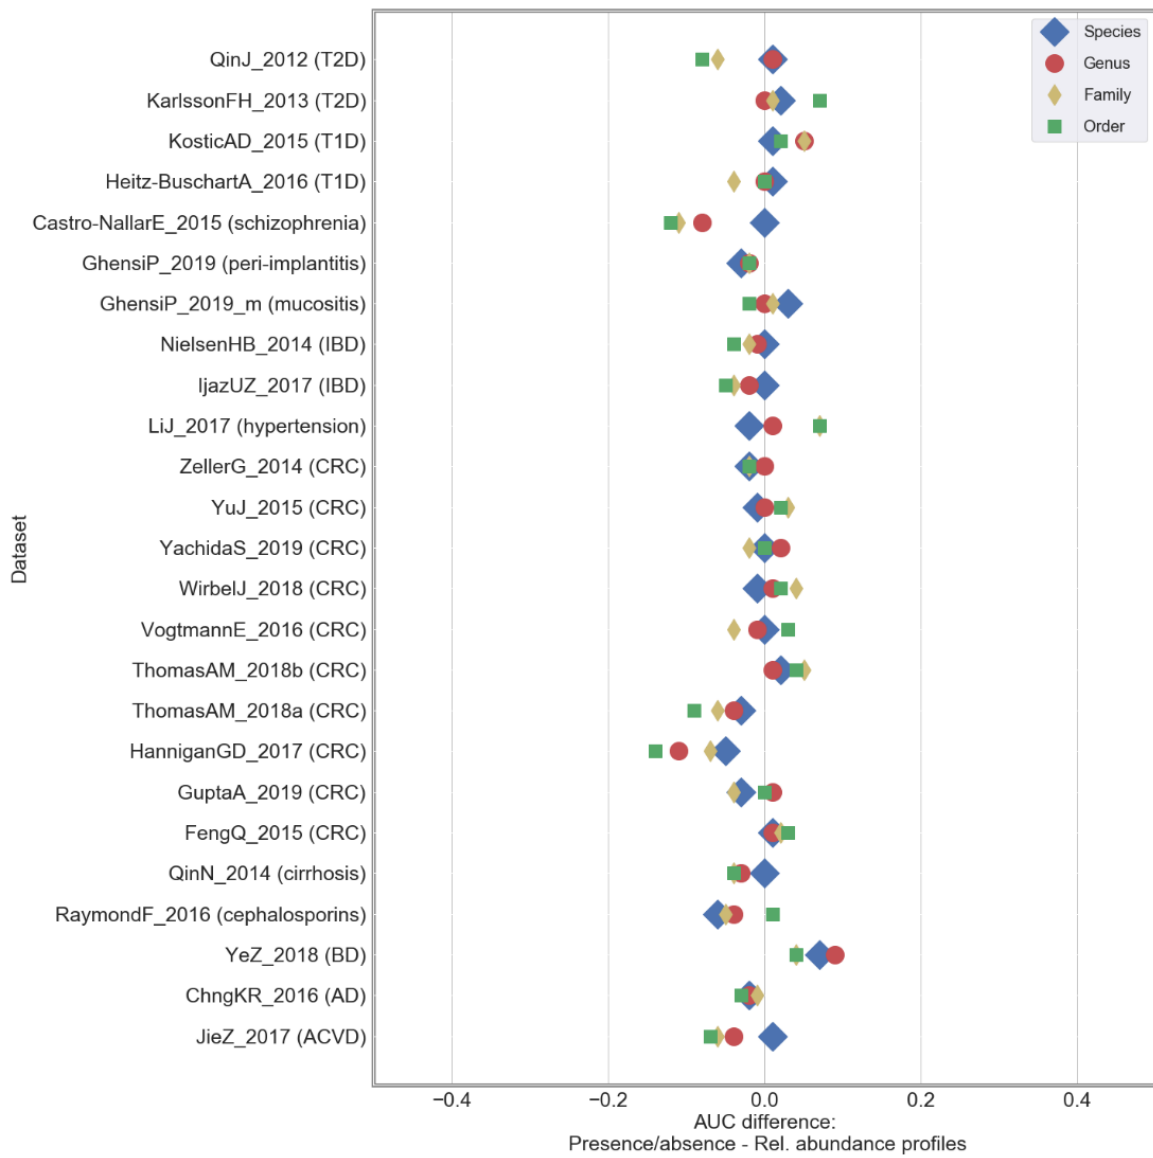

**Fig. 4.**

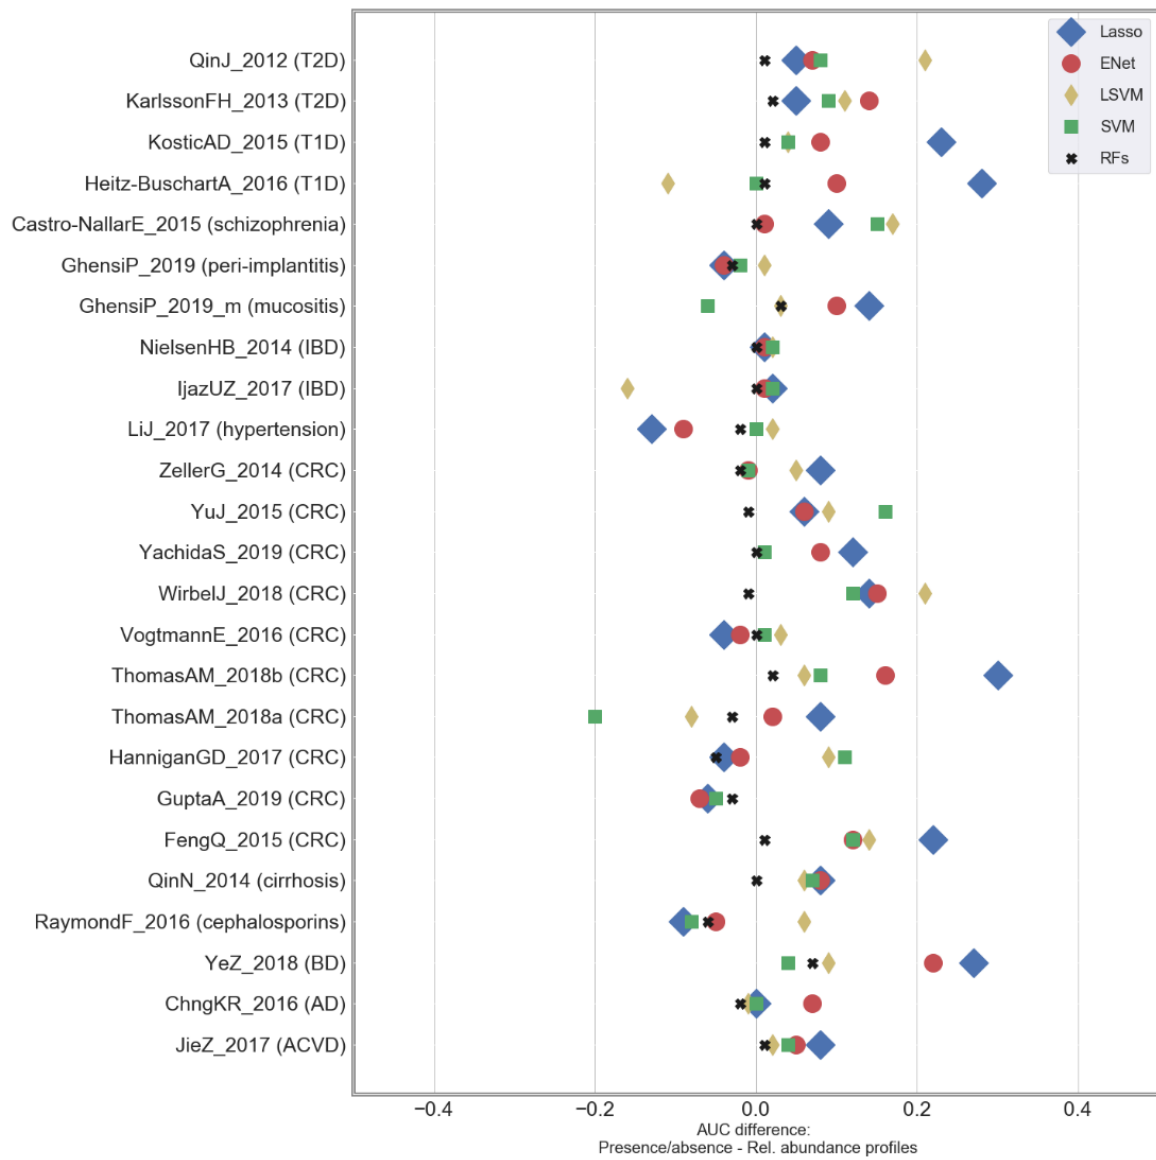

Fig. 5.

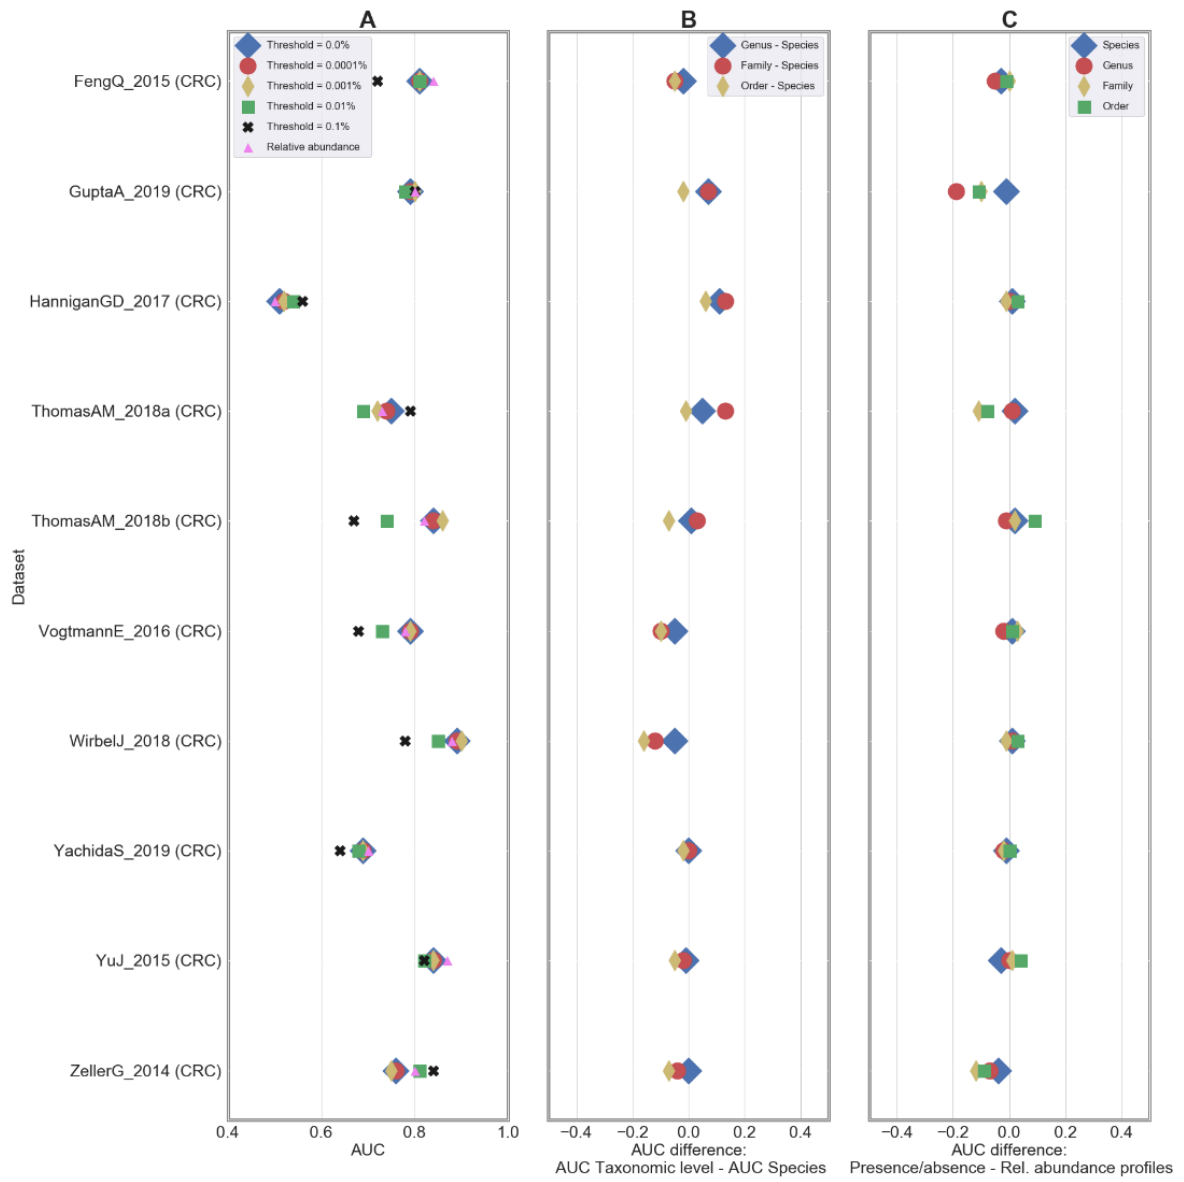

**Fig. 6.**

AUC comparison

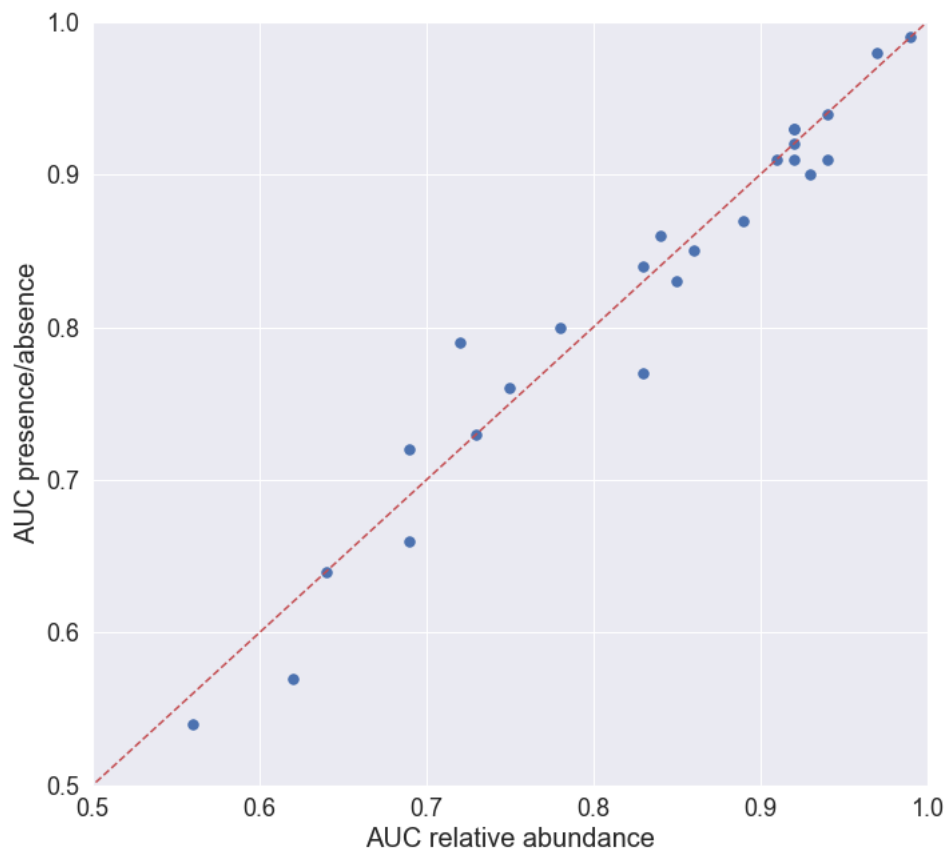

S1 Fig.

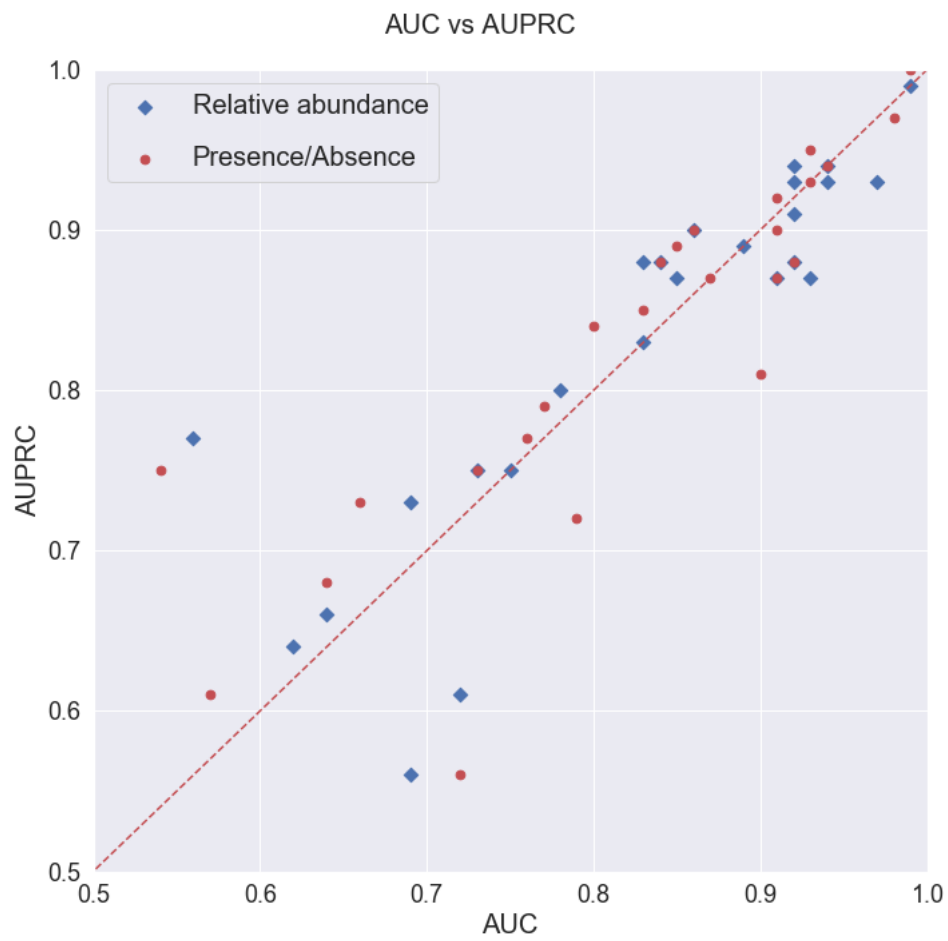

S2 Fig.



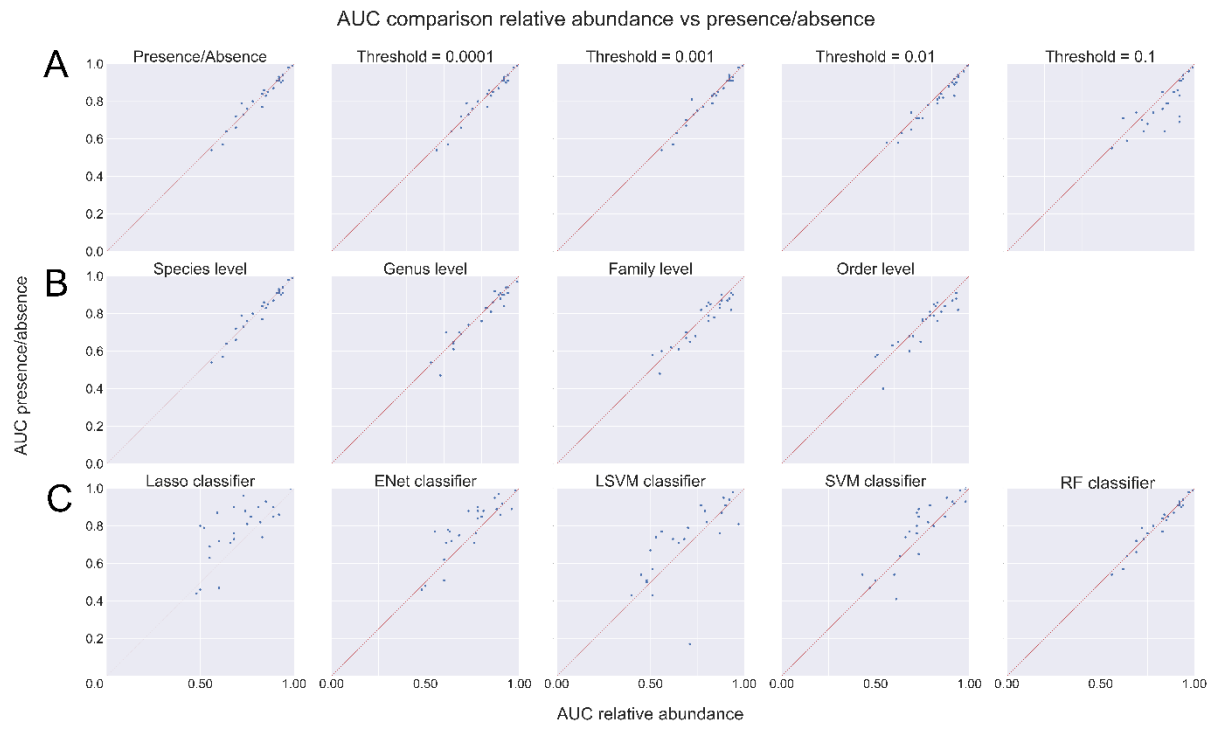

**S3 Fig.**

AUC comparison

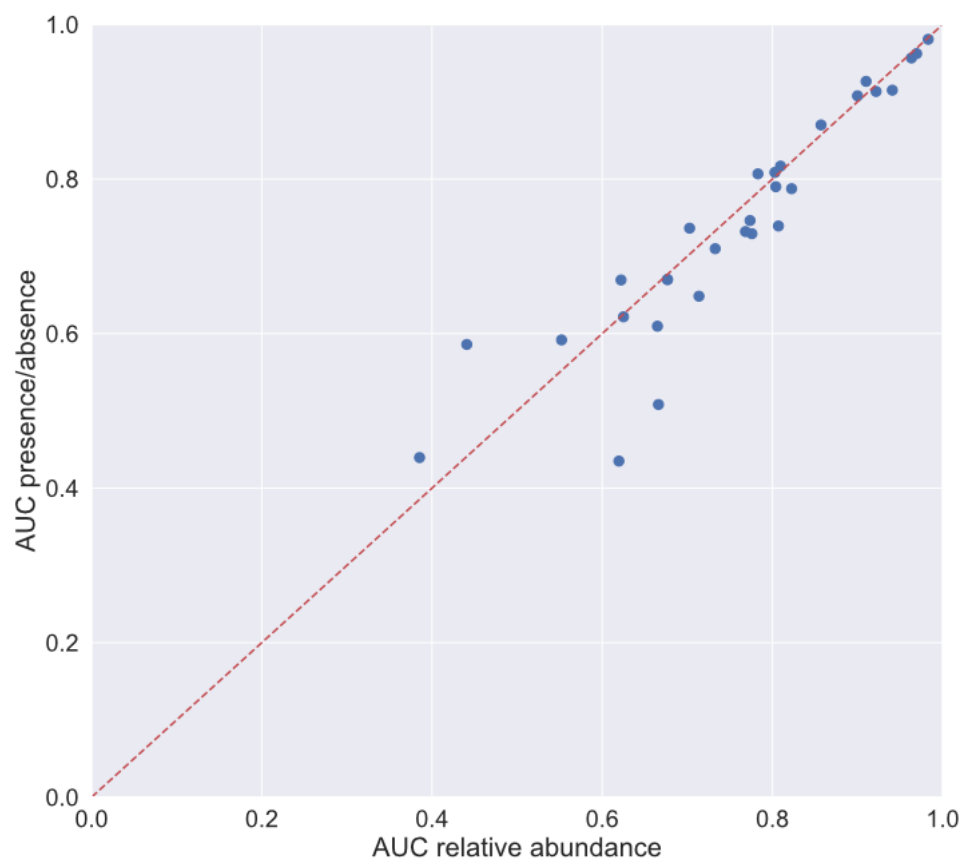

S4 Fig.



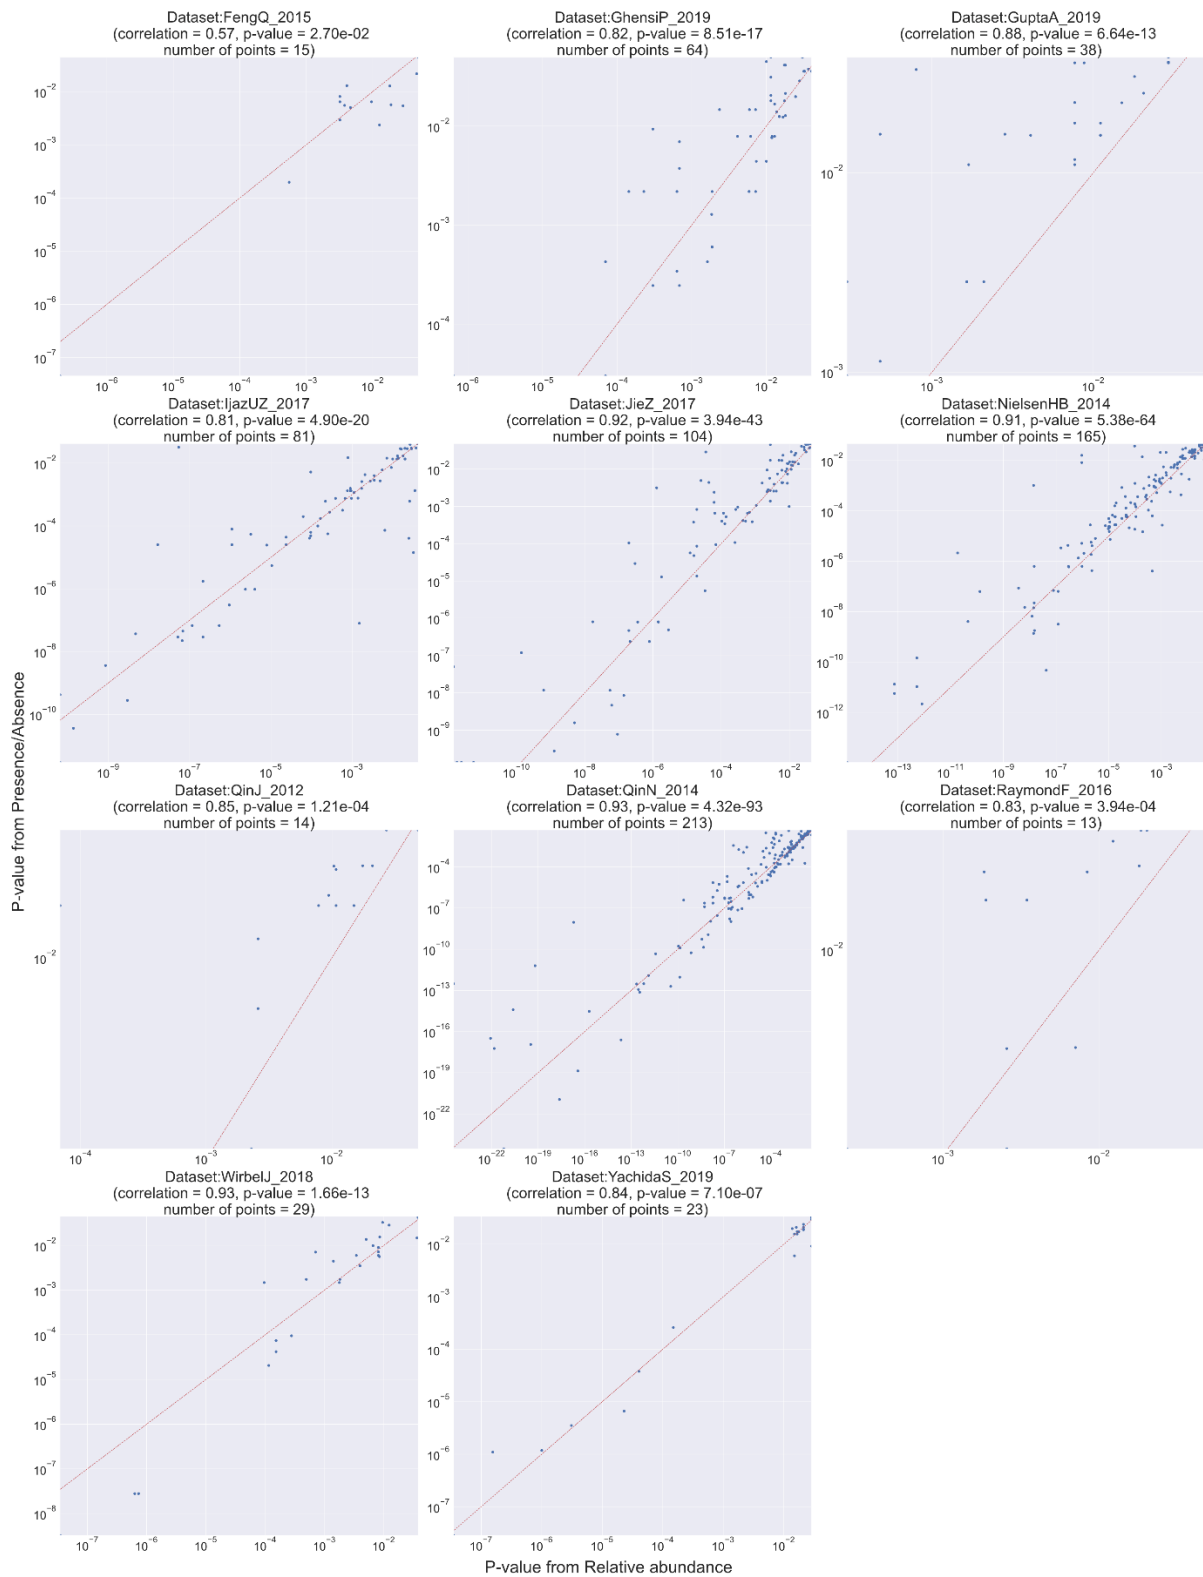

S6 Fig.



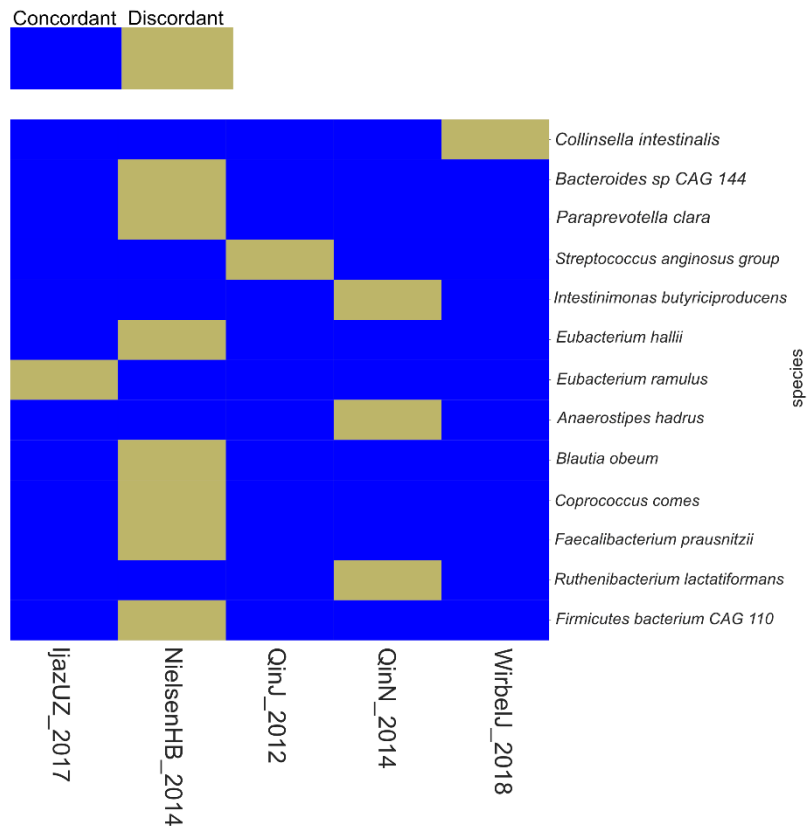

S8 Fig.

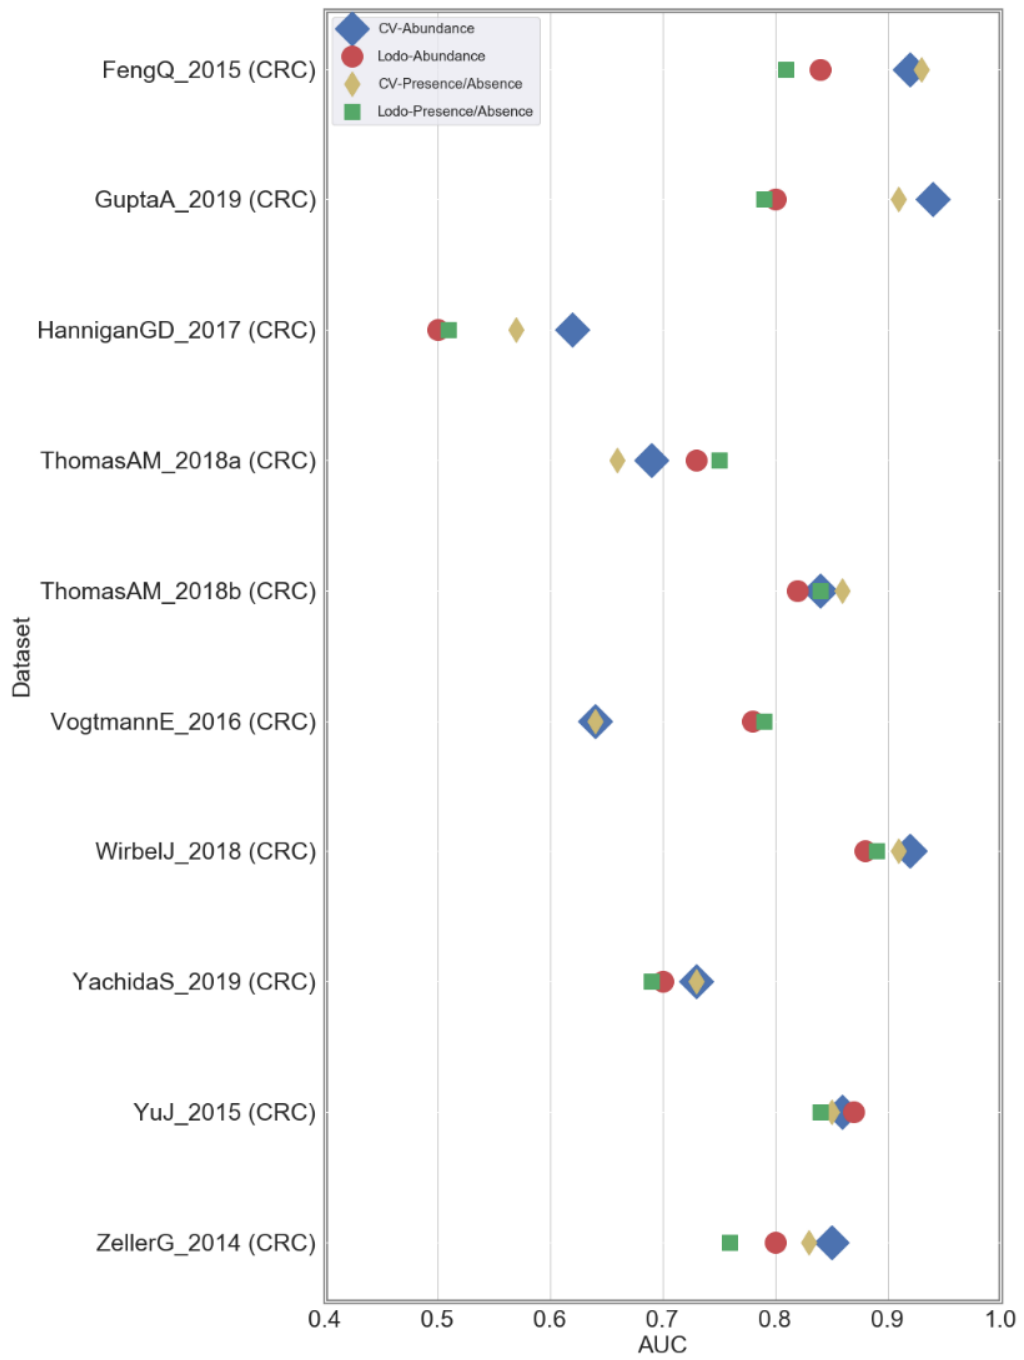

S9 Fig.

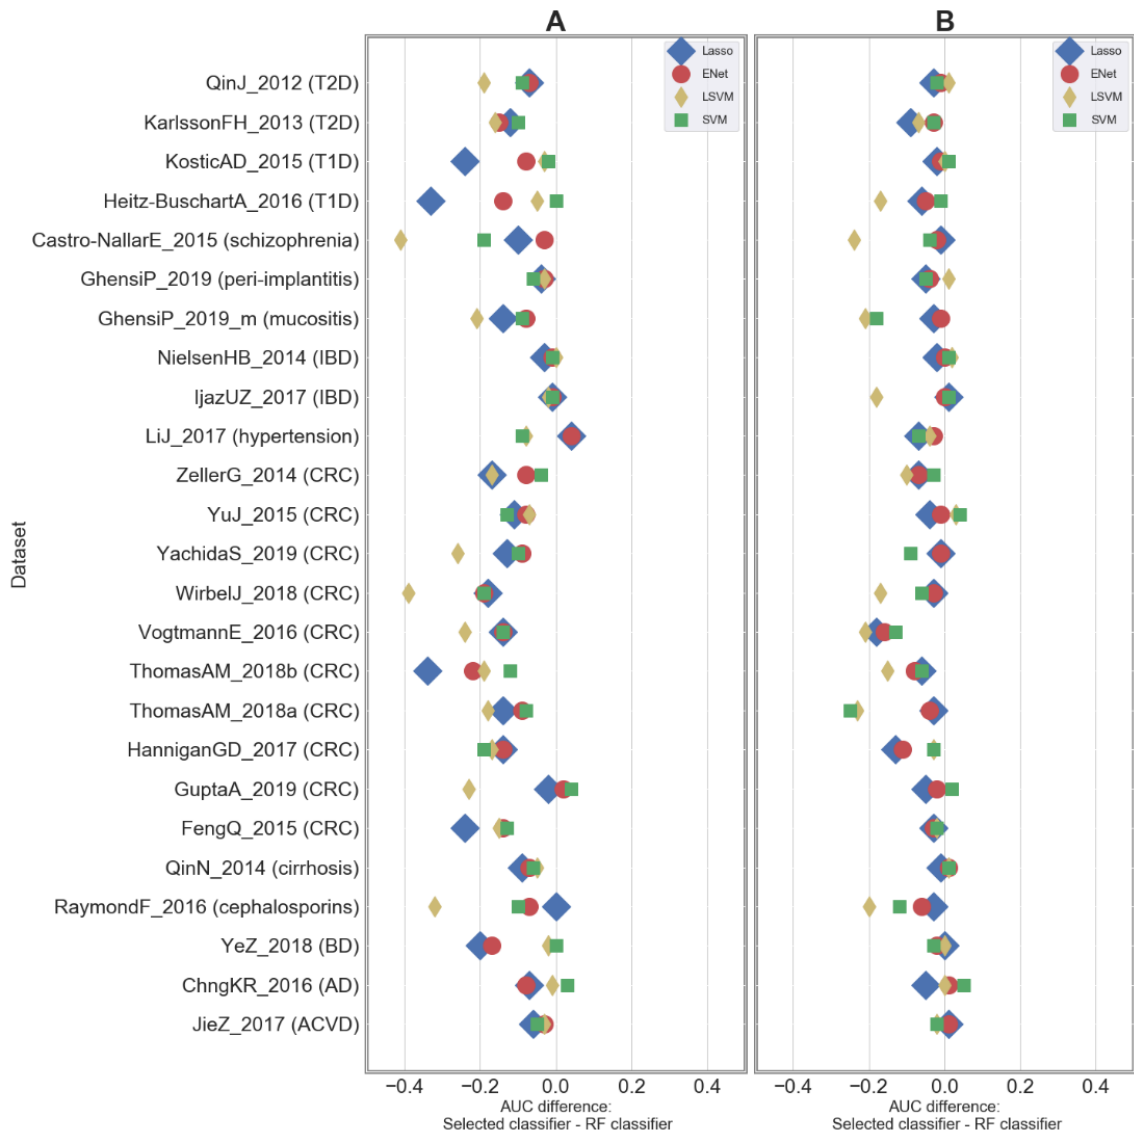

S10 Fig.



We also ask that Figs S7 and S8 be redone using a colorblind-safe color scheme rather than rely on red/green distinction.

Response

We updated Figs S7 and S8 by using a colourblind-safe color scheme:

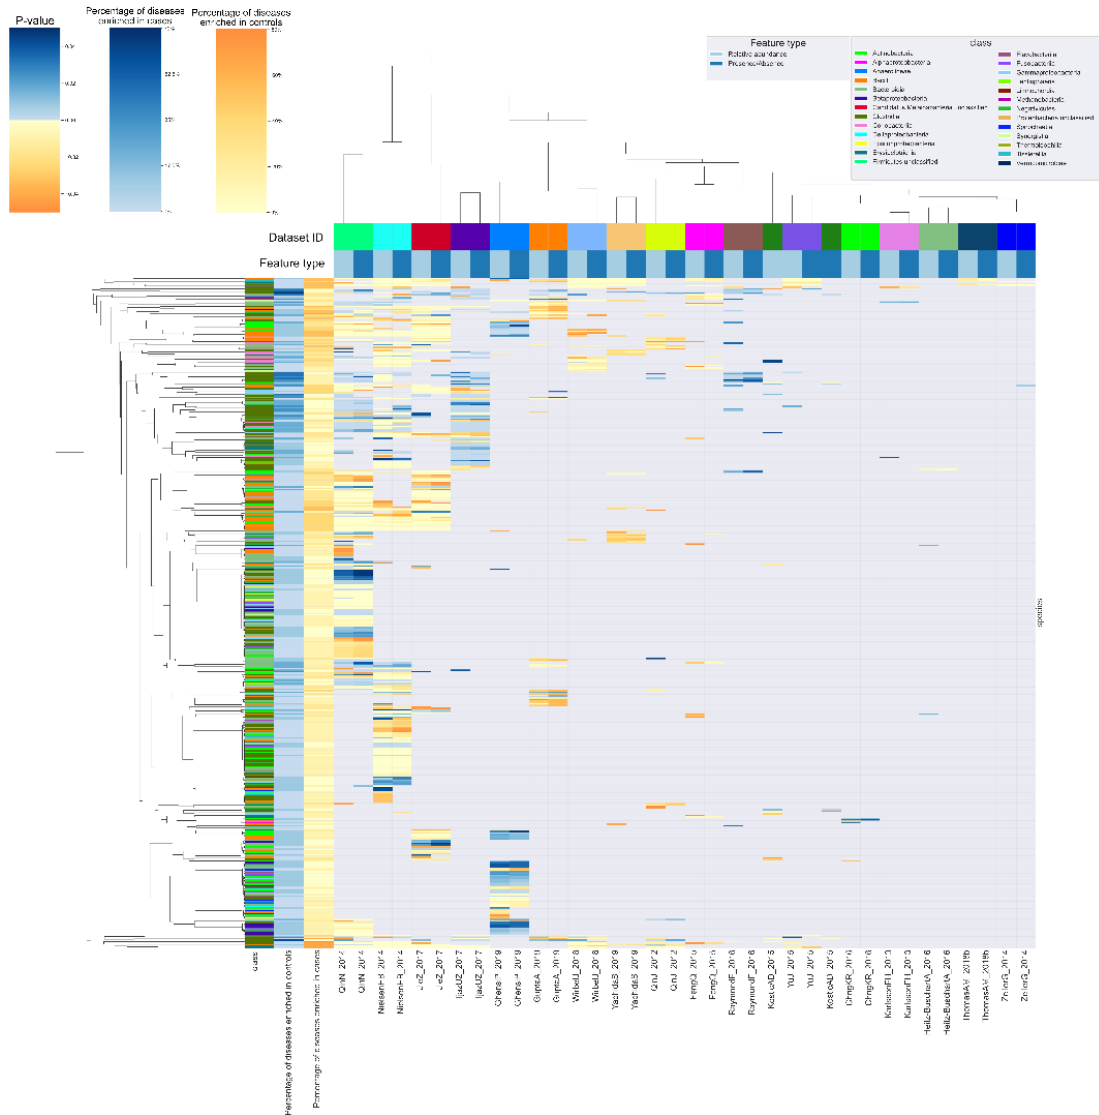

S7 Fig.

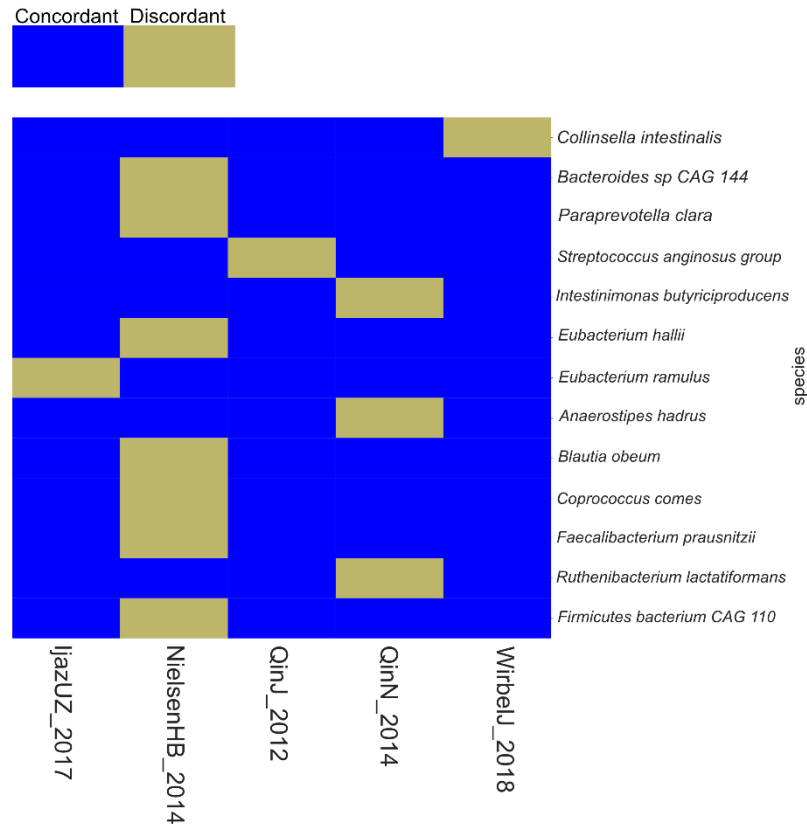

**S8 Fig.**

We ask the authors to consider pointing to Figs. S1 and S2 from the caption of Fig 1.

Response

We pointed the two supplementary figures in the caption of Fig 1:

**Fig 1. Classification accuracies are robust to degradation from species-level relative abundance to presence/absence profiles in shotgun datasets.** Results obtained on 25 case-control studies for host phenotype classification from human microbiomes. (A) Number of case and control samples across the different studies. (B) AUC and (C) AUPRC scores using RF as back-end classifiers on species-level taxonomic profiles. Comparison between relative abundance (in blue) and presence/absence (in red) profiles highlighted negligible differences and no statistical differences in none of the studies (see **S1 Fig** for AUC scores and **S2 Table** for p-values). Metrics of comparison in terms of AUC, AUPRC, precision, recall, and F1 are summarized in **S2 Table** and **S2 Fig**. (D) Number of statistically significant taxa from relative abundance (in blue) and presence/absence (in red) profiles.
